# Supplementary material for: Design and Escherichia coli Expression of a Natively Folded Multi-Disulfide Bonded Influenza H1N1-PR8 Receptor-Binding Domain (RBD)
Source: MDPI journal article supplement (doi:10.3390/ijms25073943), 2024-04-01
Supplement: s1 [file s1]

## Supplementary Materials

Figure S1. Plasmid construction and MALDI-TOF mass spectroscopy of H1N1-PR8-RBD.

Figure S2. RP-HPLC elution profiles of the oxidized and reduced H1N1-PR8-RBD.

Figure S3. The secondary structure content of H1N1-PR8-RBD.

Table S1. H1N1-PR8-RBD cleavage sites by trypsin calculated by PeptideCutter.

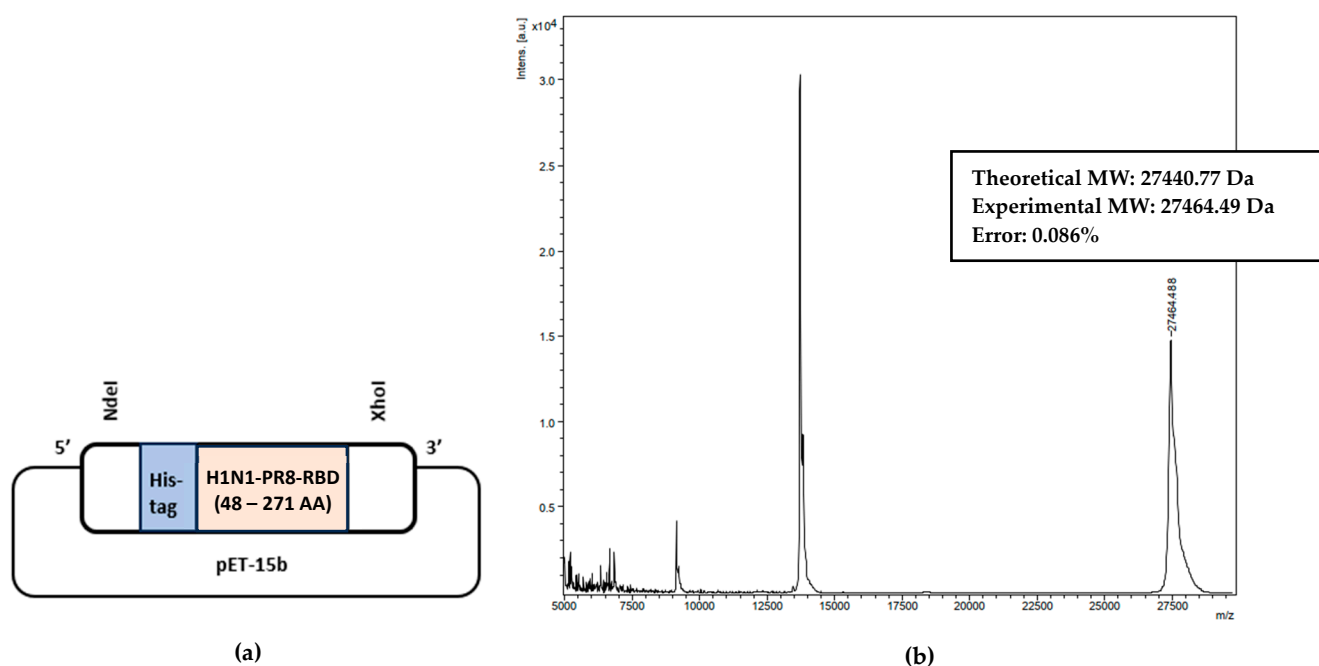

**Figure S1. Plasmid construction and MALDI-TOF mass spectroscopy of H1N1-PR8-RBD.** (a) pET-15b vector of H1N1-PR8-RBD; (b) MALDI-TOF mass spectroscopy of H1N1-PR8-RBD. The protein's molecular weight was determined using matrix-assisted laser desorption/ionization-time of flight (MALDI-TOF) mass spectrometry on an Autoflex speed TOF/TOF instrument (Bruker Daltonics, Billerica, MA, USA). To prepare the matrix solution, 10 mg of sinapic acid was dissolved in 1 mL of a solution containing 300  $\mu$ L of acetonitrile, 100  $\mu$ L of 1% trifluoroacetic acid, and 600  $\mu$ L of Milli Q water. Protein samples were prepared by mixing 1  $\mu$ L of protein solution with 9  $\mu$ L of the matrix solution. Subsequently, a gradient of 10  $\mu$ M, 1  $\mu$ M, and 0.1  $\mu$ M concentrations were spotted onto the MALDI-TOF MS plate and allowed to air-dry. The experiment molecular

weight was measured with MALDI-TOF mass spectroscopy, and the theoretical molecular weight was calculated using ProtParam (<https://web.expasy.org/protparam/> (accessed on 04/03/2023)), relative error given.

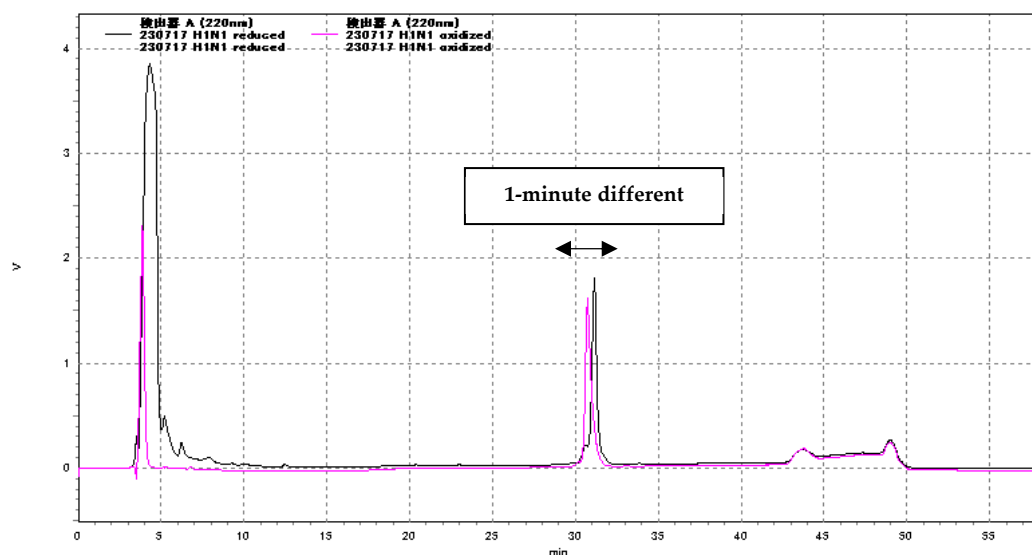

**Figure S2. RP-HPLC elution profiles of the oxidized and reduced H1N1-PR8-RBD.** The pink peak represents the oxidized RBD, while the black peak represents the reduced RBD obtained by incubating 1 hour with 1M DTT.

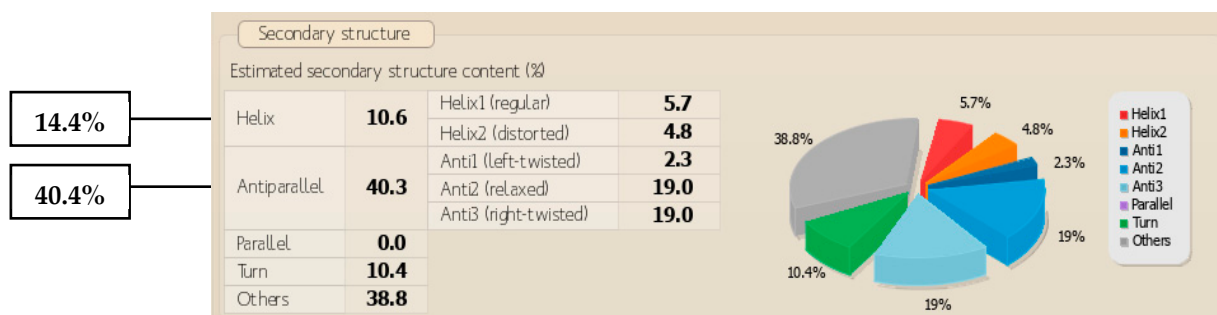

**Figure S3. The secondary structure content of H1N1-PR8-RBD.** The secondary structure content was calculated using BeStSel. The values in the box indicate the secondary structure content obtained from RBD region of hemagglutinin crystal structure PDB ID 1RU7.

**Table S1. H1N1-PR8-RBD cleavage sites by trypsin calculated by PeptideCutter ([https://web.expasy.org/peptide\\_cutter/](https://web.expasy.org/peptide_cutter/)) (accessed on 23/12/2023)).** The calculation was performed based on H1N1-PR8-RBD amino acid sequence. Two accessible cleavage sites by trypsin at the N- and C-termini of the oxidized H1N1-PR8-RBD are highlighted.

| Position of cleavage site | Name of cleaving enzyme(s) | Resulting peptide sequence        | Peptide length [aa] | Peptide mass [Da] |
|---------------------------|----------------------------|-----------------------------------|---------------------|-------------------|
| 16                        | Trypsin                    | GSSHHHHHHSSGLVPR                  | 16                  | 1768.875          |
| 28                        | Trypsin                    | GSHMIAPLQLGK                      | 12                  | 1251.509          |
| 48                        | Trypsin                    | CNIAGWLLGNPECDPLLPVR              | 20                  | 2180.568          |
| 76                        | Trypsin                    | SWSYIVETPNSENGICYPGDFIDYEELR      | 28                  | 3297.553          |
| 87                        | Trypsin                    | EQLSSVSSFER                       | 11                  | 1268.346          |
| 93                        | Trypsin                    | FEIFPK                            | 6                   | 779.934           |
| 114                       | Trypsin                    | ESSWPNHNTNGVTAACSHEGK             | 21                  | 2226.321          |
| 119                       | Trypsin                    | SSFYR                             | 5                   | 658.712           |
| 127                       | Trypsin                    | NLLWLTEK                          | 8                   | 1016.205          |
| 133                       | Trypsin                    | EGSYPK                            | 6                   | 679.728           |
| 135                       | Trypsin                    | LK                                | 2                   | 259.349           |
| 141                       | Trypsin                    | NSYVNK                            | 6                   | 723.784           |
| 142                       | Trypsin                    | K                                 | 1                   | 146.189           |
| 144                       | Trypsin                    | GK                                | 2                   | 203.241           |
| 159                       | Trypsin                    | EVLVLWGIHHPNSK                    | 15                  | 1726.011          |
| 181                       | Trypsin                    | EQQNLYQENAYVSVVTSNYNR             | 22                  | 2633.770          |
| 182                       | Trypsin                    | R                                 | 1                   | 174.203           |
| 192                       | Trypsin                    | FTPEIAERPK                        | 10                  | 1187.361          |
| 194                       | Trypsin                    | VR                                | 2                   | 273.335           |
| 199                       | Trypsin                    | DQAGR                             | 5                   | 545.553           |
| 232                       | Trypsin                    | MNYYWTLLKPGDTIIFEANGNLIAPMYAFALSR | 33                  | 3795.429          |
| 243                       | end of sequence            | GFGSGIITSNA                       | 11                  | 1023.110          |
